# Supplementary material
Source: PubMed Central journal article supplement (PMC8435797)
Supplement: 00243-2021.SUPPLEMENT.pdf [file 00243-2021.SUPPLEMENT.pdf]

## Supplement

### Changes in pulmonary function and patient-reported outcomes during COVID-19 recovery: a longitudinal, prospective cohort study.

Aditi S Shah MD<sup>a</sup>  
Min Hyung Ryu MSc<sup>a</sup>  
Cameron J Hague MD<sup>c</sup>  
Darra T Murphy MB BCh BAO<sup>c</sup>  
James C Johnston MD<sup>a</sup>  
Christopher J Ryerson MD<sup>a,b</sup>  
Christopher Carlsten\*<sup>^</sup> MD<sup>a</sup>  
Alyson W Wong\* MD<sup>a,b</sup>

\*co-senior authors

<sup>^</sup>Corresponding author

<sup>a</sup> Division of Respiratory Medicine, Department of Medicine, University of British Columbia, Vancouver, Canada

<sup>b</sup> Centre for Heart Lung Innovation, University of British Columbia, Vancouver, Canada

<sup>c</sup> Department of Radiology, University of British Columbia, Vancouver, Canada

**Table S1: Clinical characteristics and pulmonary function tests of patients hospitalised with COVID-19, with and without dyspnea 6 months after symptom onset.**

Dyspnea was defined as UCSD dyspnea score higher than 10. Echocardiogram data is from 3 months after symptom onset. Data are shown as mean  $\pm$  SD or median (IQR). \*Asthma, chronic obstructive pulmonary disease, interstitial lung disease, or previous pulmonary embolism.

*Abbreviations: DLCO= diffusing capacity of the lung for carbon monoxide; EQ-5D = EuroQol-5 Dimension; FEV<sub>1</sub>= forced expiratory volume in one second; FVC = forced vital capacity; LVEF = left ventricular ejection fraction; PASP = Pulmonary Artery Systolic Pressure; PHQ-9 = Patient Health Questionnaire-9; PSQI = Pittsburgh Sleep Quality Index; RV= residual volume; TLC=total lung capacity; UCSD = University of California, San Diego shortness of breath questionnaire; VAS = visual analogue scale.*

| Features                                 | Patients without dyspnea<br>(n = 42) | Patients with dyspnea<br>(n = 31) | P value          |
|------------------------------------------|--------------------------------------|-----------------------------------|------------------|
| <b>Demographics</b>                      |                                      |                                   |                  |
| Age                                      | 65 (53 – 72)                         | 65 (49 – 76)                      | 0.7              |
| Male sex, n (%)                          | 29 (69)                              | 15 (48)                           | 0.08             |
| Ever smoker, n (%)                       | 11 (26)                              | 12 (39)                           | 0.26             |
| <b>Comorbidities, n (%)</b>              |                                      |                                   |                  |
| Hypertension                             | 13 (31)                              | 14 (45)                           | 0.21             |
| Diabetes                                 | 11 (26)                              | 8 (26)                            | 0.97             |
| Chronic pulmonary disease*               | 4 (10)                               | 5 (16)                            | 0.48             |
| Coronary heart disease                   | 3 (7)                                | 4 (13)                            | 0.45             |
| Malignancy                               | 5 (12)                               | 3 (10)                            | 1.00             |
| Chronic kidney disease                   | 0                                    | 6 (19)                            | <b>0.004</b>     |
| <b>Respiratory symptoms</b>              |                                      |                                   |                  |
| UCSD dyspnea score                       | 4 (1 – 7)                            | 31 (18 – 41)                      | <b>&lt;0.001</b> |
| Cough VAS, mm                            | 9 (5 – 40)                           | 28 (13 – 40)                      | 0.06             |
| <b>Patient-reported outcome measures</b> |                                      |                                   |                  |
| EQ-5D health utility                     | 0.91 (0.90 – 0.95)                   | 0.83 (0.76 – 0.87)                | <b>&lt;0.001</b> |
| EQ-5D VAS                                | 85 (80 – 95)                         | 75 (65 – 85)                      | <b>&lt;0.001</b> |
| PSQI                                     | 3 (2 – 6)                            | 8 (5 – 11)<br>(n=30)              | <b>&lt;0.001</b> |
| PHQ-9                                    | 0 (0 – 2)                            | 5 (1 – 7)                         | <b>&lt;0.001</b> |
| <b>Pulmonary function tests</b>          |                                      |                                   |                  |
| FEV <sub>1</sub> %-predicted             | 95 $\pm$ 16                          | 85 $\pm$ 14<br>(n=30)             | <b>0.008</b>     |
| FVC %-predicted                          | 97 $\pm$ 17                          | 86 $\pm$ 14<br>(n=30)             | <b>0.004</b>     |
| FEV <sub>1</sub> /FVC %                  | 85 $\pm$ 11                          | 84 $\pm$ 12<br>(n=30)             | 0.72             |
| TLC %-predicted                          | 90 $\pm$ 12                          | 81 $\pm$ 13<br>(n=26)             | <b>0.01</b>      |

|                                            |              |                   |             |
|--------------------------------------------|--------------|-------------------|-------------|
| DLCO %-predicted                           | 84± 16       | 74 ± 17<br>(n=28) | <b>0.02</b> |
| <b>Transthoracic Echocardiogram (n=72)</b> |              |                   |             |
| LVEF (%)                                   | 60 (59 – 65) | 60 (60 – 65)      | 0.88        |
| PASP (mmHg)                                | 27 (22 – 31) | 27 (23 – 30)      | 0.75        |
